# Supplementary material for: An Efficient Procedure for Inserting Buffers to Generate Robust Berth Plans in Container Terminals
Source: Hindawi journal article supplement (doi:10.1155/2021/6619538), 2021-03-29
Supplement: f1 [file 6619538.f1.zip]

Archive with 3 entries (3 files):
- Figure S1 An example of crossover operation in GA..pdf
- Supplementary Description.docx
- Supplementary Materials.docx
