# Supplementary material for: An Efficient Procedure for Inserting Buffers to Generate Robust Berth Plans in Container Terminals
Source: Hindawi journal article supplement (doi:10.1155/2021/6619538), 2021-03-29
Supplement: f1 [file 6619538.f1.zip › Supplementary Description.docx]

## Supplementary Description

The first subsection of supplementary materials provides the details of the mathematical model of BAP that we used to derive the original berth plan, in which additional notations are defined in Table S1 and the objective function as well as constraints is presented. While the genetic algorithm we adopted to solve large scale BAPs is introduced in the second subsection of supplementary materials, where the pseudo code shows the process of the algorithm and Figure S1 presents an example of crossover operation in the algorithm to clarify the detailed procedure.
