# Supplementary material for: An Efficient Procedure for Inserting Buffers to Generate Robust Berth Plans in Container Terminals
Source: Hindawi journal article supplement (doi:10.1155/2021/6619538), 2021-03-29
Supplement: f1 [file 6619538.f1.zip › Supplementary Materials.docx]

## Supplementary Materials

### The mathematical model of BAP

Apart from the notations listed in Table 1, several other notations are defined in Table S1. And the BAP model used in this study can then be formulated as follows:

(1)

Subject to

(2)

(3)

(4)

(5)

(6)

(7)

(8)

(9)

Equation (1) along with constraint (2) indicates that the objective function is to minimize the total designed departure delays of all vessels. Constraint (3) guarantees that vessels can only start its operation after arrival. Constraint (4) defines the boundaries of the wharf. Constraints (5) and (6) are the definitions of and . Constraint (7) excludes the case, which implies that there is no conflicts in the solution. Finally, constraint (8) and (9) define the domains of variables.

Table S1. Additional notations used for formulation.

|  | The total length of the wharf. |
| --- | --- |
|  | 1, if the designed operation starting of vessel is later than the departure time of vessel ; 0, otherwise. |
|  | 1, if vessel is located on the top of vessel in the time-space diagram; 0, otherwise. |
|  | The designed departure delay of vessel , . |
|  | A large positive constant. |

### The Procedure of GA

The main procedure of GA is described as follow:

| ***Data***: Set , maximum number of consecutive iterations without improvement , mutation probability , the population size . |
| --- |
| Initialize the population and 20 of the initial candidates are generated by using different priority rules while the rest are generated randomly; |
| ***While*** () ***do*** |
| Calculate the fitness of all candidates according to the Analytic Constructive Algorithm; |
| Select 15 pairs of candidates using the roulette method, and the candidates with better fitness value have higher possibility to be chosen; |
| Execute an 1-point crossover operation as shown in Figure S1; |
| Execute mutation operation with the probability of , which consists of exchanging the sequences of two randomly selected vessels; |
| Calculate the fitness of all new candidates according to the *Analytic Constructive Algorithm* and replace the worst candidate in last generation if current new candidates achieves better fitness; |
| Set if the best candidates have improved, otherwise set ; |
| ***End*** |
| Terminate the algorithm and output the best solution. |
| **** Analytic Constructive Algorithm*** |
| ***For*** ***do*** |
| Put the vessel with sequence into its lowest-left position; |
| ***If*** (vessel overlaps vessels already assigned) ***do*** |
| Find all feasible berthing positions without overlapping for vessel and choose the berthing position with lowest cost to place vessel ; |
| ***End if*** |
| ***End*** |
| Return the berth plan. |
