# Supplementary figures and images for: An Efficient Procedure for Inserting Buffers to Generate Robust Berth Plans in Container Terminals
Source: Hindawi journal article supplement (doi:10.1155/2021/6619538), 2021-03-29

1-point cut

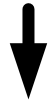

Parent 1

|   |   |   |   |   |   |
|---|---|---|---|---|---|
| 2 | 1 | 4 | 3 | 5 | 6 |
|---|---|---|---|---|---|

Parent 2

|   |   |   |   |   |   |
|---|---|---|---|---|---|
| 4 | 6 | 5 | 2 | 3 | 1 |
|---|---|---|---|---|---|

Crossover

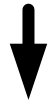

|   |   |   |   |   |   |
|---|---|---|---|---|---|
| 2 | 1 | 4 | 2 | 3 | 1 |
| 4 | 6 | 5 | 3 | 5 | 6 |

Revise

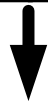

*Randomly exchange  
the redundant genes*

Child 1

|   |   |   |   |   |   |
|---|---|---|---|---|---|
| 2 | 1 | 4 | 6 | 3 | 5 |
|---|---|---|---|---|---|

Child 2

|   |   |   |   |   |   |
|---|---|---|---|---|---|
| 4 | 6 | 5 | 3 | 1 | 2 |
|---|---|---|---|---|---|

Supplement: f1 [file 6619538.f1.zip › Figure S1 An example of crossover operation in GA..pdf]
